# Supplementary material for: Retracted: Glabridin attenuates the migratory and invasive capacity of breast cancer cells by activating microRNA-200c
Source: PubMed Central journal article supplement — Cancer Sci. 2014 May 21;105(7):875–82. doi: 10.1111/cas.12426 (PMC4317926; doi:10.1111/cas.12426), 2014-05-21
Supplement: cas0105-0875-sd1.pdf [file cas0105-0875-sd1.pdf]

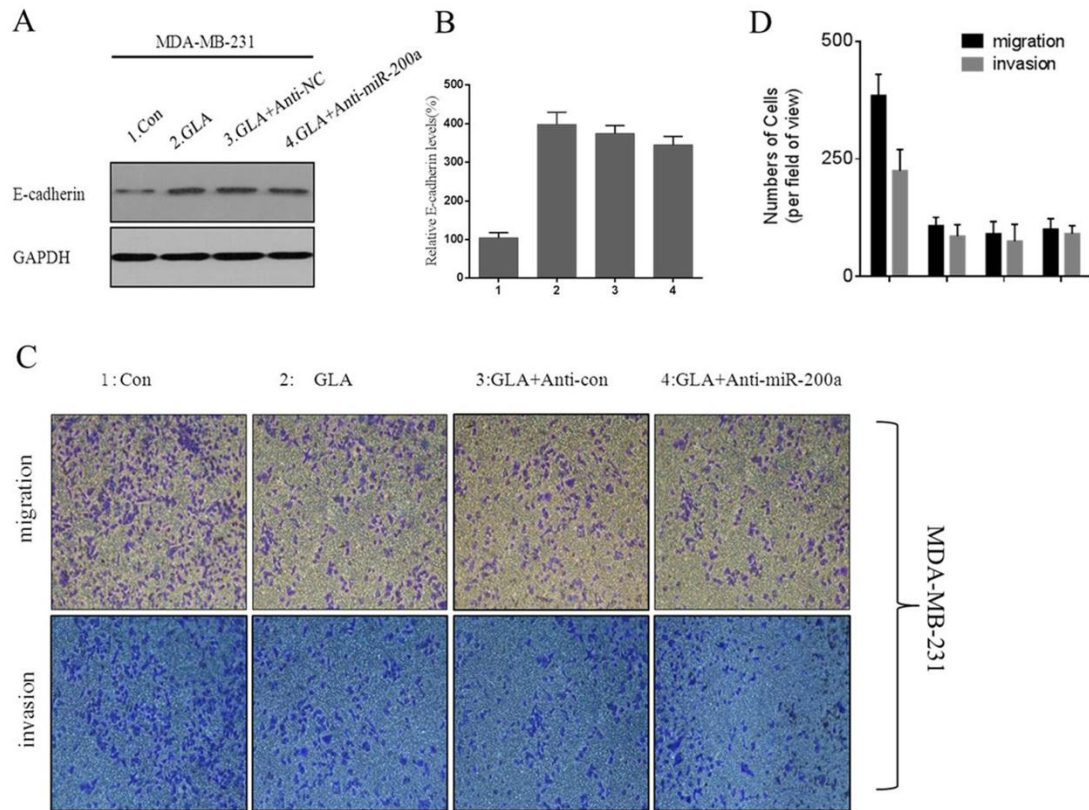

*Fig. S1. Functions of miR-200a in GLA-induced attenuation of the invasive capacities in MDA-MB-231 cells.*

After MDA-MB-231 cells were transfected with anti-con or anti-miR-200a for 12 h, they were exposed to 0 or 10  $\mu$ M GLA for 48 h. Western blot analyses (**A**) and relative protein levels (**B**) of E-cadherin (mean  $\pm$  SD, n = 3). (**C**) Transwell assay analyses of migratory and invasive capacities of MDA-MB-231 cells. (**D**) Numbers of migrating/invading MDA-MB-231 cells (mean  $\pm$  SD, n = 5).

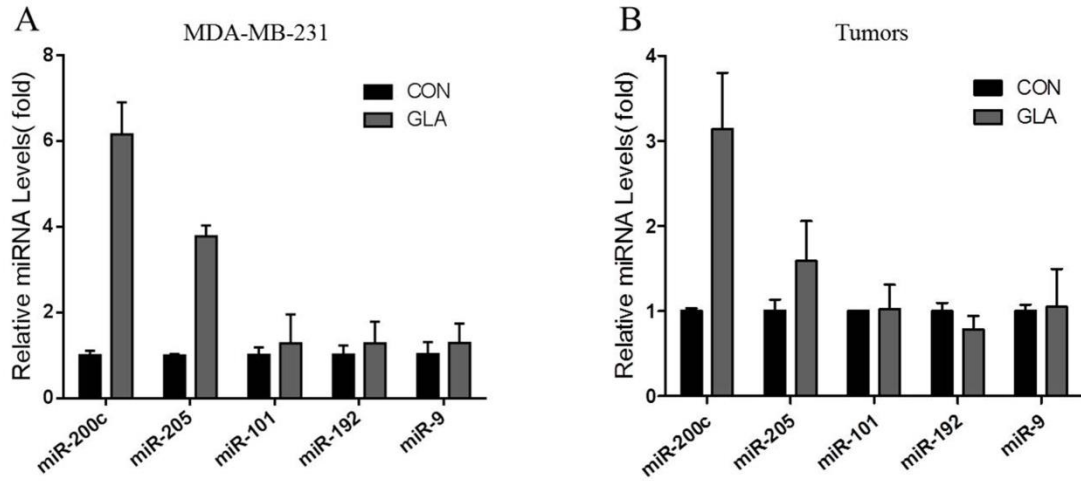

*Fig. S2. Effects of GLA on the expressions of miR-205, miR-101, miR-192, and miR-9 in vitro and in vivo.*

(A) MDA-MB-231 cells were exposed to 10  $\mu$ M GLA for 48 h. qRT-PCR analysis of the miR-200c, miR-205, miR-101, miR-192, and miR-9. (B) Nude mice bearing breast cancers were treated with the vehicle or with GLA (20 mg/kg/d). qRT-PCR analysis of miR-200c, miR-205, miR-101, miR-192, and miR-9.
